# Supplementary material
Source: PubMed Central journal article supplement (PMC545520)

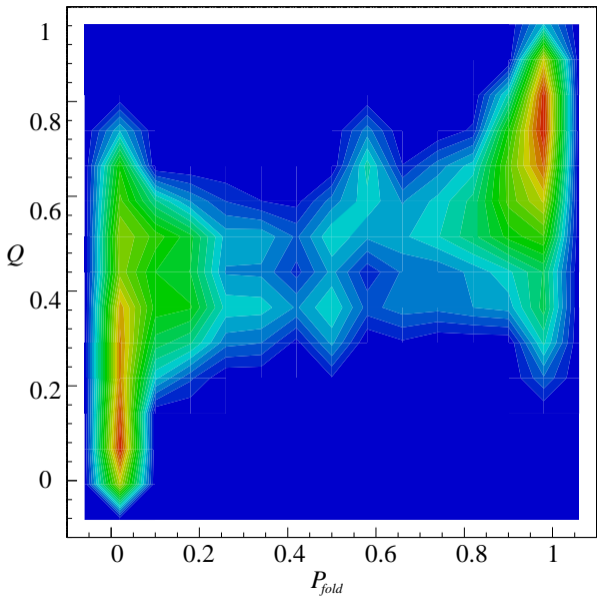

Supplement: pnas_102_3_628__1.pdf [file pnas_102_3_628__1.pdf]

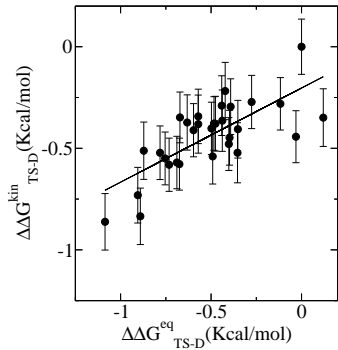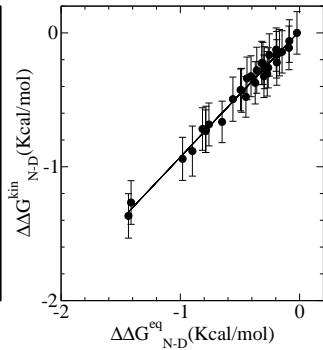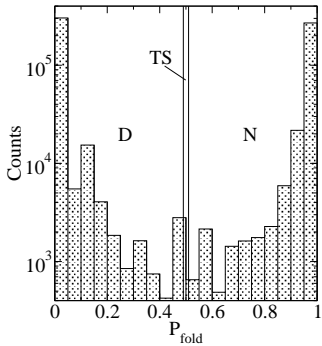

Supplement: pnas_102_3_628__2.pdf [file pnas_102_3_628__2.pdf]
